# Supplementary material for: Functional Analysis of the Dioxin Response Elements (DREs) of the Murine CYP1A1 Gene Promoter: Beyond the Core DRE Sequence
Source: PubMed Central journal article supplement (PMC4013641; doi:10.3390/ijms15046475), 2014-04-16
Supplement: ijms-15-06475-s001.pdf [file ijms-15-06475-s001.pdf]

## Supplementary Information

**Table S1.** Primers for constructing vectors containing original DRE sequences.

| DRE site | Sequence of the sense primer                               |
|----------|------------------------------------------------------------|
| -1379    | 5'-TTAAGGTACCTGAGTTAGACACGCCAAGTTCAGATGAGCTCGGCCAACAGAC-3' |
| -1203    | 5'-TTAAGGTACCCGAGCATCGCACGCAAACCCGGCCCGAGCTCGGCCAACAGAC-3' |
| -1058    | 5'-TTAAGGTACCTCCCCAGCTAGCGTGACAGCACTGGAGCTCGGCCAACAGAC-3'  |
| -981     | 5'-TTAAGGTACCGGCTCTTCTCACGCAACTCCGGGGCGAGCTCGGCCAACAGAC-3' |
| -892     | 5'-TTAAGGTACCAGGCTTACGCACGCTAGCCTCAGGAGAGCTCGGCCAACAGAC-3' |
| -821     | 5'-TTAAGGTACCCCTGCTGTCTCGCGTGGATCCTTCCGAGCTCGGCCAACAGAC-3' |
| -488     | 5'-TTAAGGTACCTGCGCTTCTCACGCGAGCTTGGACTGAGCTCGGCCAACAGAC-3' |

**Table S2.** Primers for constructing vectors containing inverted 25 bp original DRE sequences.

| DRE site | Sequence of the sense primer                               |
|----------|------------------------------------------------------------|
| -1379    | 5'-TTAAGGTACCATCTGAACTTGGCGTGTCTAACTCAGAGCTCGGCCAACAGAC-3' |
| -1203    | 5'-TTAAGGTACCGGGCCGGGTTTGCCTGCGATGCTCGGAGCTCGGCCAACAGAC-3' |
| -1058    | 5'-TTAAGGTACCCAGTGCTGTCACGCTAGCTGGGGGAGAGCTCGGCCAACAGAC-3' |
| -981     | 5'-TTAAGGTACCGCCCCGGAGTTGCGTGAGAAGAGCCGAGCTCGGCCAACAGAC-3' |
| -892     | 5'-TTAAGGTACCTCCTGAGGCTAGCGTGCGTAAGCCTGAGCTCGGCCAACAGAC-3' |
| -821     | 5'-TTAAGGTACCGGAAGGATCCACGCGAGACAGCAGGGAGCTCGGCCAACAGAC-3' |
| -488     | 5'-TTAAGGTACCAGTCCAAGCTCGCGTGAGAAGCGCAGAGCTCGGCCAACAGAC-3' |

**Table S3.** Primers for constructing vectors containing inverted core DRE sequences.

| DRE site | Sequence of the sense primer                               |
|----------|------------------------------------------------------------|
| -1379    | 5'-TTAAGGTACCTGAGTTAGATGGCGTGAGTTCAGATGAGCTCGGCCAACAGAC-3' |
| -1203    | 5'-TTAAGGTACCCGAGCATCGTTGCGTGACCCGGCCCGAGCTCGGCCAACAGAC-3' |
| -1058    | 5'-TTAAGGTACCTCCCCAGCCACGCTAACAGCACTGGAGCTCGGCCAACAGAC-3'  |
| -981     | 5'-TTAAGGTACCGGCTCTTCTTTGCGTGCTCCGGGGCGAGCTCGGCCAACAGAC-3' |
| -892     | 5'-TTAAGGTACCAGGCTTACGTAGCGTGGCCTCAGGAGAGCTCGGCCAACAGAC-3' |
| -821     | 5'-TTAAGGTACCCCTGCTGTCCACGCGAGATCCTTCCGAGCTCGGCCAACAGAC-3' |
| -488     | 5'-TTAAGGTACCTGCGCTTCTTCGCGTGGCTTGGACTGAGCTCGGCCAACAGAC-3' |

**Table S4.** Primers for constructing DRE mutants at position -488.

| Base mutation                                                          | Sequence of the sense primer                               |
|------------------------------------------------------------------------|------------------------------------------------------------|
| “N” mutation of original DRE sequence at position -488                 |                                                            |
| G→C                                                                    | 5'-TTAAGGTACCTGCGCTTCTCACGCCAGCTTGGACTGAGCTCGGCCAACAGAC-3' |
| G→A                                                                    | 5'-TTAAGGTACCTGCGCTTCTCACGCAAGCTTGGACTGAGCTCGGCCAACAGAC-3' |
| G→T                                                                    | 5'-TTAAGGTACCTGCGCTTCTCACGCTAGCTTGGACTGAGCTCGGCCAACAGAC-3' |
| “N” mutation of inverted 25 bp original DRE sequences at position -488 |                                                            |
| C→G                                                                    | 5'-TTAAGGTACCAGTCCAAGCTGGCGTGAGAAGCGCAGAGCTCGGCCAACAGAC-3' |
| C→A                                                                    | 5'-TTAAGGTACCAGTCCAAGCTAGCGTGAGAAGCGCAGAGCTCGGCCAACAGAC-3' |
| C→T                                                                    | 5'-TTAAGGTACCAGTCCAAGCTTGCCTGAGAAGCGCAGAGCTCGGCCAACAGAC-3' |
| “N” mutation of inverted core DRE sequences at position -488           |                                                            |
| C→G                                                                    | 5'-TTAAGGTACCTGCGCTTCTTGGCGTGGCTTGGACTGAGCTCGGCCAACAGAC-3' |
| C→A                                                                    | 5'-TTAAGGTACCTGCGCTTCTTAGCGTGGCTTGGACTGAGCTCGGCCAACAGAC-3' |
| C→T                                                                    | 5'-TTAAGGTACCTGCGCTTCTTTGCGTGGCTTGGACTGAGCTCGGCCAACAGAC-3' |
